# Supplementary material for: THz to far-infrared spectra of the known crystal polymorphs of phenylalanine
Source: Royal Society of Chemistry journal article supplement (doi:10.1039/d3cp05805k), 2024-01-01
Supplement: d3cp05805k1.pdf [file d3cp05805k1.pdf]

## SUPPLEMENTAL INFORMATION

### THz to far-infrared spectra of the known crystal polymorphs of Phenylalanine

Thomas A. Niehaus,<sup>1,\*</sup> Emilien Prost,<sup>1</sup> Vincent Lorient,<sup>1</sup>

Franck Lépine,<sup>1</sup> Luc Bergé,<sup>2</sup> and Stefan Skupin<sup>1</sup>

<sup>1</sup>*Univ Lyon, Université Claude Bernard Lyon 1, CNRS,*

*Institut Lumière Matière, F-69622 Villeurbanne, France*

<sup>2</sup>*Centre Lasers Intenses et Applications, Université de Bordeaux–CNRS–CEA, 33405 Talence Cedex, France*

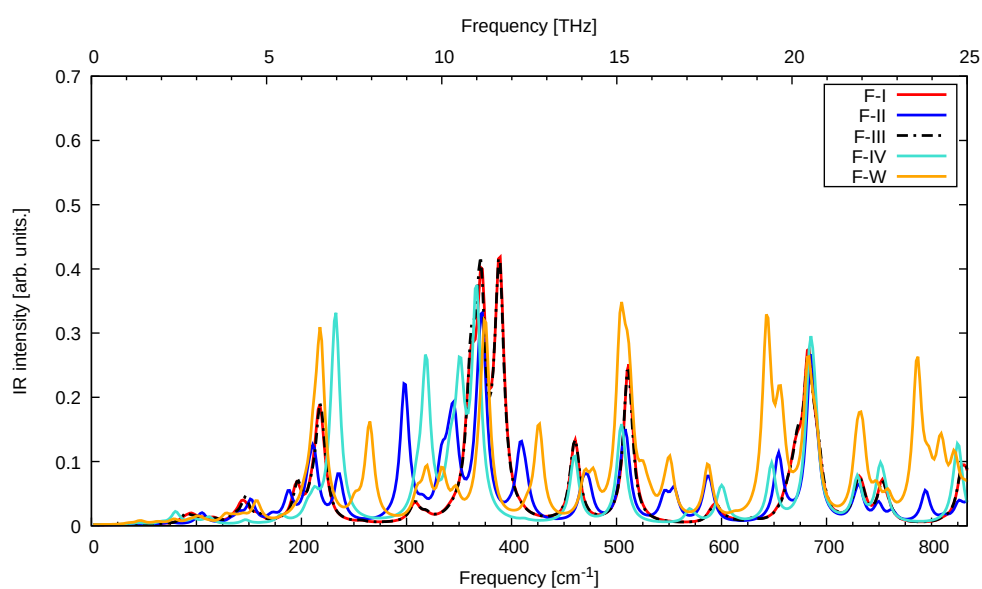

SI Figure 1. Calculated absorption spectrum of all considered polymorphs **F-I** to **F-IV** together with the monohydrate **F-W** up to 25 THz. The intensity is normalized for the number of molecules in the simulation cell.

---

\* thomas.niehaus@univ-lyon1.fr

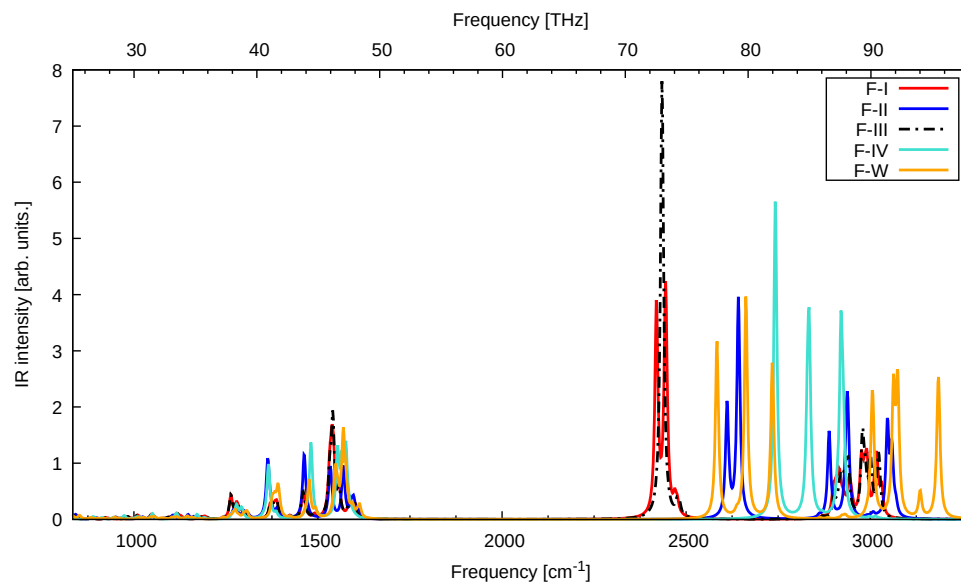

SI Figure 2. Calculated absorption spectrum of all considered polymorphs **F-I** to **F-IV** together with the monohydrate **F-W** between 25 and 100 THz. The intensity is normalized for the number of molecules in the simulation cell.

| theory ( <b>F-III</b> ) | experiment (THz-TDS) | experiment (FTIR) | mode description               |
|-------------------------|----------------------|-------------------|--------------------------------|
| 90                      |                      |                   | $\omega$ (Phe)                 |
| 146                     |                      |                   | $\tau$ (Phe)                   |
| 158                     |                      |                   | $\rho$ (Phe)                   |
| 197                     |                      |                   | $\rho$ (Phe)                   |
| 218                     | 200                  |                   | $\nu$ (O-NH <sub>3</sub> )     |
| 308                     |                      |                   | $\rho$ (CH <sub>2</sub> )      |
| 371                     | 370                  | 366               | $\rho$ (NH <sub>3</sub> )      |
| 388                     |                      | 374               | $\rho$ (NH <sub>3</sub> )      |
| 461                     | 470                  | 470               | $\gamma$ (Ph)                  |
| 512                     | 526                  | 526               | $\gamma$ (Ph)                  |
| 595                     | 606                  | 606               | $\tau$ (NH <sub>3</sub> )      |
| 683                     | 700                  | 700               | $\gamma$ (Ph)                  |
| 731                     | 747                  | 747               | $\omega$ (H-Ph)                |
| 753                     | 780                  | 780               | $\gamma$ (CO <sub>2</sub> )    |
| 830                     | 853                  | 850               | $\omega$ (H-Ph)                |
| 886                     | 914                  | 914               | $\tau$ (H-Ph)                  |
| 923                     |                      | 951               | $\delta$ (CH-NH <sub>3</sub> ) |
| 983                     |                      | 1005              | $\omega$ (NH <sub>3</sub> )    |
| 1010                    |                      | 1026              | $\nu$ (Ph)                     |
| 1049                    |                      | 1076              | $\nu$ (Ph)                     |
| 1096                    |                      | 1131              | $\nu$ (C-N)                    |
| 1117                    |                      | 1155              | $\omega$ (NH <sub>3</sub> )    |
| 1192                    |                      | 1227              | $\nu$ (C-C)                    |
| 1263                    |                      | 1309              | $\nu$ (C-O)                    |
| 1280                    |                      | 1322              | $\nu$ (C-C)                    |

SI Table I. Vibrational frequencies of Phenylalanine up to 1300 cm<sup>-1</sup> from the DFT calculations for conformer **F-III** and the two experimental techniques (THz-TDS, FTIR) used in this article in units of wavenumbers (cm<sup>-1</sup>). The abbreviations in the approximate mode description stand for:  $\tau$ : twisting,  $\rho$ : rocking,  $\omega$ : wagging,  $\nu$ : stretching,  $\delta$ : scissoring,  $\gamma$ : out-of-plane motion, Ph: phenyl ring, Phe: Phenylalanine.
